# Supplementary material for: An Integration of Genome-Wide Association Study and Gene Expression Profiling to Prioritize the Discovery of Novel Susceptibility Loci for Osteoporosis-Related Traits
Source: PLoS Genet. 2010 Jun 10;6(6):e1000977. doi: 10.1371/journal.pgen.1000977 (PMC2883588; doi:10.1371/journal.pgen.1000977)
Supplement: Table S2 — SNPs with association test p-value <1.0E-06 in the Framingham Study. (0.02 MB XLS) [file pgen.1000977.s005.xls]

## Sheet: Table S2
	Table S2. SNPs with association test p-value < 10-6 in the Framingham Study
								Women		Men		Combined		Meta-analysisc
	SNP	Alleles	Chr.	Position	Genea	MAF	Traitb	Beta	P-value	Beta	P-value	P-value		P-value
	Women p < 10-6
	rs9362321	T -> C	6	87192966	HTR1E *	0.18	NL	0.239	5.57e-07	0.075	0.15			1.622e-06
	rs1403811	G -> A	9	106306764	OR13F1	0.29	NW	-0.187	7.97e-07	-0.046	0.29			0.00177
	rs13333529	C -> A	16	1482688	TELO2 *	0.02	NSA	-0.68	7.98e-07	0.008	0.95			8.37e-06
	rs16965654	A -> G	17	22631819	WSB1 *	0.01	NW	-0.737	4.15e-08	-0.459	0.00195			n.a.
	Men p < 10-6
	rs2209158	A -> C	1	110596541	KCNC4 *	0.38	NL	0.014	0.69	-0.206	6.43e-07			0.000438
	rs10857820	A -> G	1	110706448	SLC16A4 *	0.42	NL	0.012	0.74	-0.208	4.75e-07			0.00153
	rs11930889	G -> T	4	39968567	RHOH *	0.01	NSA	0.123	0.58	-1.513	5.26e-07			n.a.
	rs12719517	C -> T	5	138333401	SIL1	0.33	LS BMD	-0.005	0.87	0.193	5.15e-07			0.00597
	rs11573709	G -> A	9	109125076	RAD23B	0.23	NSA	-0.004	0.93	-0.242	2.37e-07			3.32e-06
	Combined women and men p < 10-6
	rs3917781	A -> G	1	167836357	SELP	0.01	NL	-0.633	0.00262	-0.753	1.09e-05	2.5e-07		n.a.
	rs16839563	T -> C	1	238406736	FMN2	0.01	NL	-0.749	0.000103	-0.926	0.00167	5.97e-07		n.a.
	rs17792131	T -> C	2	85586703	MAT2A*	0.05	LS BMD	0.373	2.96e-06	0.268	0.00362	5.37e-08		0.000283
	rs17007700	A -> C	2	119353189	EN1 *	0.01	NL	-0.589	0.00278	-0.691	8.86e-05	9.75e-09		n.a.
	rs6943507	T -> A	7	6957416	C7orf28B*	0.49	NL	0.122	0.000196	0.137	0.000245	1.8e-07		0.0568
	rs16906033	T -> C	8	79799033	C8orf70 *	0.01	NW	-0.581	0.000603	-1.015	0.00275	9.2e-08		n.a.
	rs10980133	A -> G	9	111782607	PALM2	0.19	NW	0.145	0.00121	0.195	0.000145	7.98e-07		0.79
	rs372	A -> G	13	31383542	RXFP2 *	0.05	NW	-0.31	5.28e-05	-0.251	0.00394	7.76e-07		0.847
	rs16965654	A -> G	17	22631819	WSB1 *	0.01	NW	-0.737	4.15e-08	-0.459	0.00195	6.89e-10		n.a.
	rs710122	A -> G	22	45576719	TBC1D22A	0.28	NL	-0.159	7.33e-06	-0.099	0.02	7.9e-07		0.000991
	a SNPs are located in either 5’ upstream or 3’ downstream flanking regions of the closest gene.
	b NL: Neck Length; NW: Neck Width; NSA: Neck Shaft Angle
	c: Meta-analysis combining results from Framingham, Rotterdam and TwinsUK (Women only) Study
	n.a.: We did not perform meta-analysis for SNPs with MAF =< 0.01, since their genotypes were not imputed in Rotterdam or TwinsUK studies
