# Supplementary material for: An Integration of Genome-Wide Association Study and Gene Expression Profiling to Prioritize the Discovery of Novel Susceptibility Loci for Osteoporosis-Related Traits
Source: PLoS Genet. 2010 Jun 10;6(6):e1000977. doi: 10.1371/journal.pgen.1000977 (PMC2883588; doi:10.1371/journal.pgen.1000977)
Supplement: Table S4 — Genes were predicted to be causally linked with bone phenotypes using the Likelihood-based Causality Model (LCMS). (0.02 MB XLS) [file pgen.1000977.s007.xls]

## Sheet: Table S4
Table S4. Genes were predicted to be causally linked with bone
phenotypes using the Likelihood-based Causality Model (LCMS)
Candidate			Number of significant
Gene	Traitsa	Tissueb	eQTL and trait QTL pair
PPAP2B	TbTh	adipose	3
HECW2	TbSp	liver	2
	TbTh	liver	3
CASR	TbN	muscle	3
	TbSp	muscle	2
MMRN1	TbTh	muscle	3
IRX2	TbTh	liver	2
PDZD2	TbTh	adipose	2
	BMD	liver	2
CACNB2	TbN	liver	3
	TbSp	liver	2
DOCK1	TbSp	liver	3
	TbN	muscle	2
PDGFD	BMD	liver	2
	TbTh	adipose	2
RAD51L1	TbN	liver	2
	TbSp	liver	2
SALL1	DBV	liver	2
FBXO31	TbSp	muscle	3
	TbTh	muscle	2
a : Traits included bone volume fraction (BV/TV); trabecular number (TbN); trabecular thickness (TbTh); trabecular
separation (TbSp); bone mineral density of the bone volume fraction (DBV) at L5 vertebra; and total
femoral areal BMD (BMD) from mice
b: Tissues include liver, adipose and muscle tissues
